# Supplementary material for: Root Adaptation via Common Genetic Factors Conditioning Tolerance to Multiple Stresses for Crops Cultivated on Acidic Tropical Soils
Source: Front Plant Sci. 2020 Nov 12;11:565339. doi: 10.3389/fpls.2020.565339 (PMC7688899; doi:10.3389/fpls.2020.565339)
Supplement: Supplementary file 1 [file Table_1.XLSX]

## Sheet: WRKY
	Supplemental Table 1. Gene families possibly involved in pleiotropic mechanisms resulting in multiple stress tolerances (tolerance to Al toxicity, P deficiency and drought)
Gene	Locus ID	Abiotic Stress	Function	Species	Reference
AtWRKY18	At4g31800	Drought	Negative regulator of ABA signaling	Arabidopsis	Shang et al. (2010)
AtWRKY40	At1g80840	Drought	Negative regulator of ABA signaling	Arabidopsis	Shang et al. (2010)
AtWRKY42	At4g04450	P Deficiency	Positively regulates PHT1 and PHO1 transcription under P starvation	Arabidopsis	Chen et al. (2009); Su et al. (2015)
AtWRKY45	At3g01970	P Deficiency	Regulates PHT1;1 expression under P starvation	Arabidopsis	Wang et al. (2014)
AtWRKY46	At2g46400	Al Toxicity	Represses AtALMT1 expression	Arabidopsis	Ding et al. (2013)
AtWRKY46	At2g46400	Drought	Positive role in drought response via stomatal regulation	Arabidopsis	Ding et al. (2014)
AtWRKY47	At4g01720	Al Toxicity	Activates expression of XTH17 and ELP which are responsible for cell wall modification in response to Al toxicity	Arabidopsis	Li et al. (2019a)
AtWRKY6	At1g62300	P Deficiency	Negatively regulates Pi starvation response by modulating PHO1	Arabidopsis	Chen et al. (2009)
AtWRKY60	At2g25000	Drought	Negative regulator of ABA signaling	Arabidopsis	Shang et al. (2010)
AtWRKY63	At1g66600	Drought	Modulates ABA response (downstream of ABI5)	Arabidopsis	Ren et al. (2010)
AtWRKY75	At5g13080	P Deficiency	Suppresses the transcription of PSI genes, including phosphatases, Mt4/TPS1-like genes and P transporters	Arabidopsis	Devaiah et al. (2007)
OsWRKY22	Os01g60490	Al Toxicity	Activates OsFRDL4 expression	Rice	Li et al. (2018)
OsWRKY45	Os05g25770	Drought	Overexpression increases drought tolerance	Rice	Qiu and Yu (2009)
OsWRKY74	Os09g16510	P Deficiency	Positively regulates miR399	Rice	Dai et al. (2016)
SbWRKY1	Sb09g023500	Al Toxicity	Activates SbMATE expression	Sorghum	Melo et al. (2019)
SbWRKY30	Sobic.010G045700	Drought	Enhances drought tolerance by regulation of SbRD19	Sorghum	Yang et al. (2020)
TaWRKY33	Unigene22134_All	Drought	Reduces water loss by transpiration in transgenic Arabidopsis	Wheat	He et al. (2016)
Table S1. Gene families possibly involved in pleiotropic mechanisms resulting in multiple stress tolerances (tolerance to Al toxicity, P deficiency and drought).
Transcription factor gene families with possible cross-cutting roles in abiotic stress responses to Al toxicity, drought stress and P deficiency.
Table is in Excel file format, and along the bottom of the table are 5 tabs for the sub-tables that each contain the lists of members of five gene families (WRKY, STOP1, MYB, bHLH,
and NAC) involved in Al toxicity, drought stress and P deficiency.

## Sheet: STOP1
Table 1. Genes families possibly involved in pleiotropic mechanisms resulting in multiple stress tolerances (tolerance to Al toxicity, P deficiency and drought)
Gene	Locus ID	Abiotic Stress	Function	Species	Ref
AtSTOP1	At1g34370	P deficiency	Regulates AtALMT1, AtALS3 and AtRAE1 expression and involved in P and Fe homeostasis	Arabidopsis	Balzergue et al. (2017); Mora-Macias et al. (2017)
AtSTOP1	At1g34370	Drought	Regulates CIPK23 expression, controlling stomatal opening	Arabidopsis	Sadhukhan et al. (2019)
AtSTOP1	At1g34370	Al Toxicity	Regulates AtALMT expression	Arabidopsis	Iuchi et al. (2007)
SbSTOP1	Sb03g041170	Al Toxicity	Regulates SbSTAR2 and SbMATE expression	Sorghum	Huang et al. (2018)
OsART1	Os12g0170400	Al Toxicity	Regulates expression of multiple Al tolerance genes	Rice	Yamaji et al. (2009)
VuSTOP1	AKH61420	Al Toxicity	Regulates VuMATE1 expression	Vignia umbellata	Fan et al. (2015)

## Sheet: MYB
Table 1. Genes families possibly involved in pleiotropic mechanisms resulting in multiple stress tolerances (tolerance to Al toxicity, P deficiency and drought)
Gene	Locus ID	Abiotic Stress	Function	Species	Ref
AtMYB2	At2g47190	P Deficiency	Acts as a direct transcriptional activator of miR399	Arabidopsis	Baek et al. (2012)
AtMYB60	AT1G08810	Drought	A null mutation results in the constitutive reduction of stomatal opening and decreased wilting under water stress	Arabidopsis	Oh et al. (2011)
AtMYB96	AT5G62470	Drought	Its overexpression confers drought resistance when expressed in transgenic Camelina sativa	Arabidopsis	Baldoni et al. (2015)
AtPHR1	At4g28610	P Deficiency	Activates Pi deficiency responsive genes	Arabidopsis	Miura et al. (2011)
OsMYB2P-1		P Deficiency	Positively regulates P starvation signaling and rice lines overexpressing this gene have a longer primary root and more lateral roots compared to the wild type under low P conditions	Rice	Dai et al. (2012)
SiMYB75		Drought	Ectopic exprression of this gene from sesame in Arabidopsis increases drought tolerance by stomatal closure, reducing leaf water loss	Arabidopsis	Dossa et al. (2020)

## Sheet: bHLH
Table 1. Genes families possibly involved in pleiotropic mechanisms resulting in multiple stress tolerances (tolerance to Al toxicity, P deficiency and drought)
Gene	Locus ID	Abiotic Stress	Function	Species	Ref
ZmPTF1		Drought	Regulates drought tolerance by promoting root development and abscisic acid synthesis	Maize	Li et al. (2019b)
ZmPTF1		P Deficiency	Improves tolerance to low P by regulating carbon metabolism and root growth	Maize	Li et al. (2011)
AtMYC2		Drought	Activates ABA-inducible genes under drought stress	Arabidopsis	Abe et al. (2003)
AtMYB2		Drought	Activates ABA-inducible genes under drought stress	Arabidopsis	Abe et al. (2003)

## Sheet: NAC
Table 1. Genes families possibly involved in pleiotropic mechanisms resulting in multiple stress tolerances (tolerance to Al toxicity, P deficiency and drought)
Gene	Locus ID	Abiotic Stress	Function	Species	Ref
ZmNAC30		Drought	Upregulated by ZmPTF1 involved in auxin signaling	Maize	Li et al. (2019b)
ATAF2/NAC081		Drought	Upregulated by ZmPTF1 involved in auxin signaling	Maize	Li et al. (2019b)
TaRNAC1		Drought	Its overexpression increases root length, biomass, drought tolerance and grain yield under water limitation	Wheat	Chen et al. (2018a)
OsSNAC1	DQ394702	Drought	Its overexpression increases drought tolerance	Rice	Hu et al. (2006)
VuNAR1		Al Toxicity	Its overexpression in Arabidopsis improves Al resistance via Al exclusion	Vigna umbellata	Lou et al. (2020)
OsNAC6		Drought	Controls root structural adaptions and nicotianamine biosynthesis for drought tolence	Rice	Lee et al. (2017)
